# Supplementary material
Source: PubMed Central journal article supplement (PMC4880541)
Supplement: NIHMS780860-supplement-1.pdf [file NIHMS780860-supplement-1.pdf]

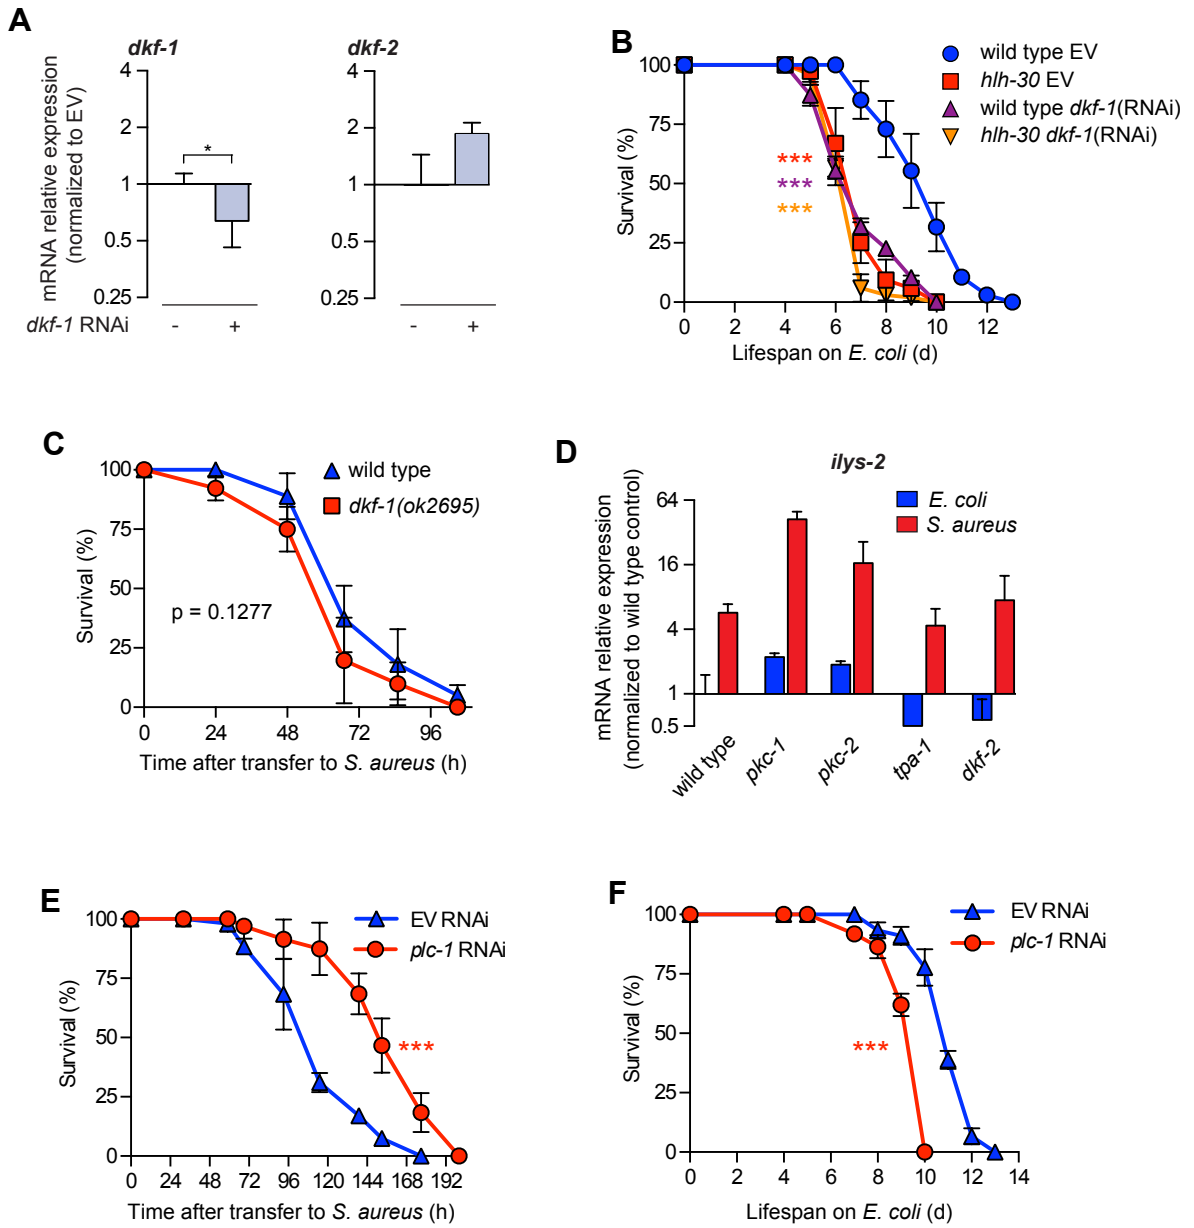

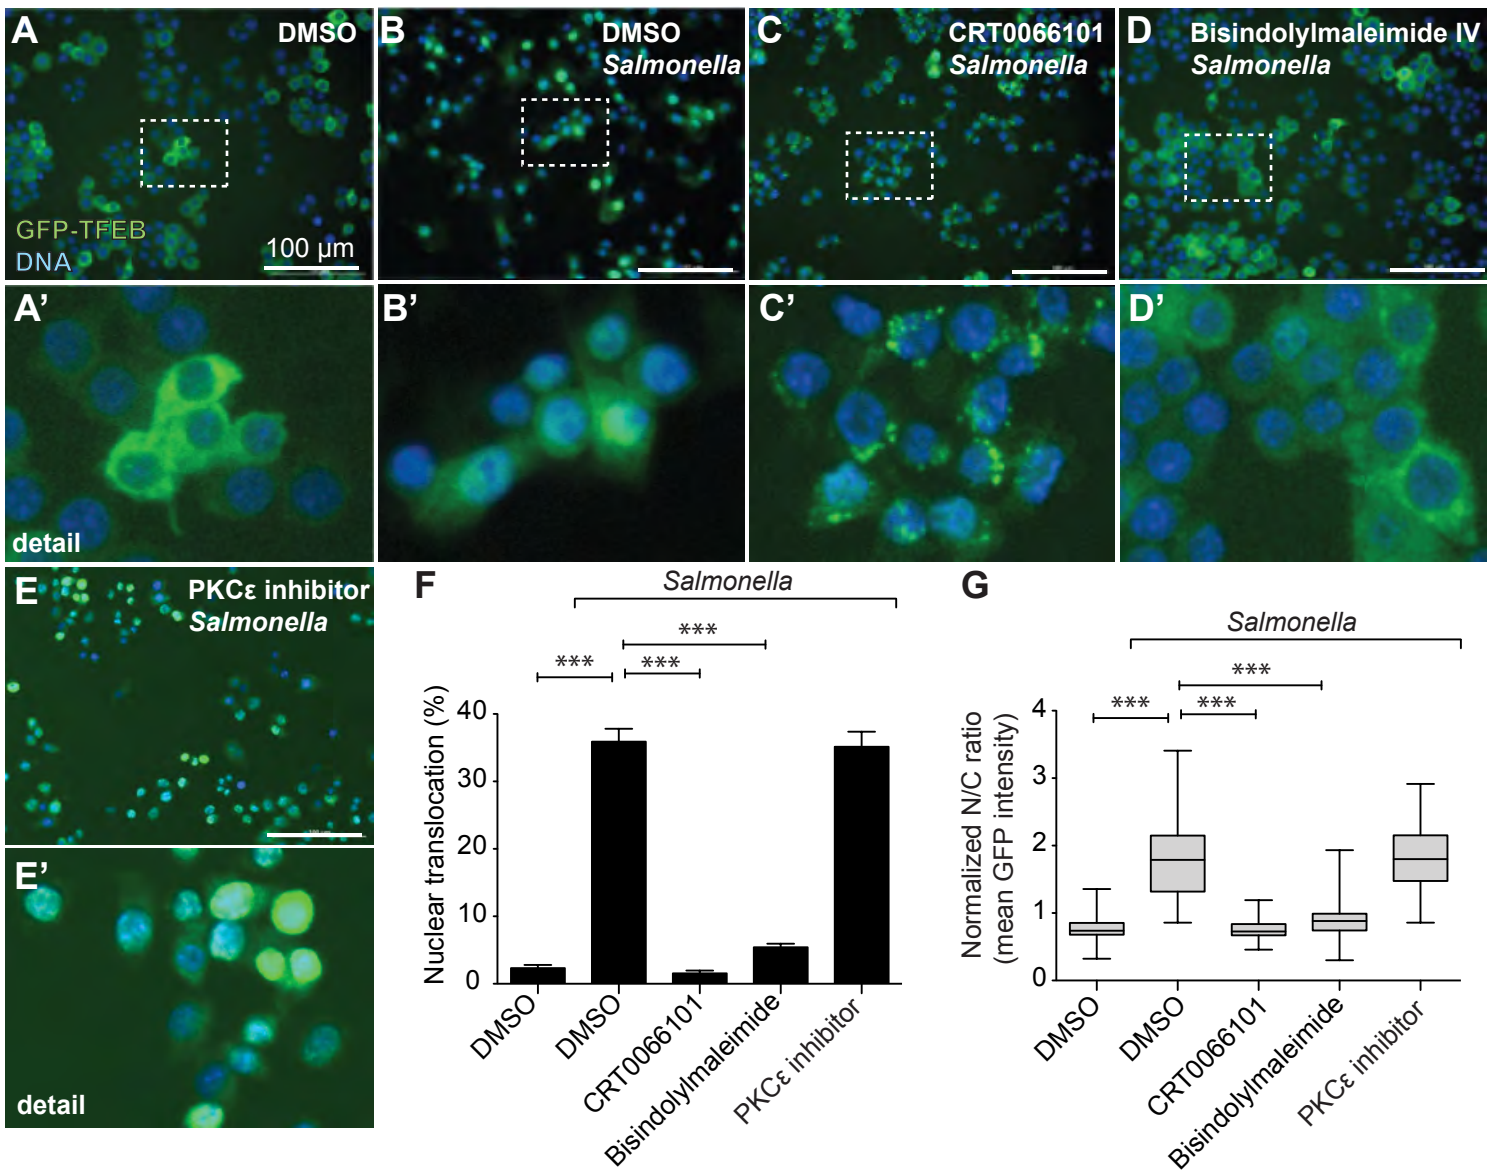

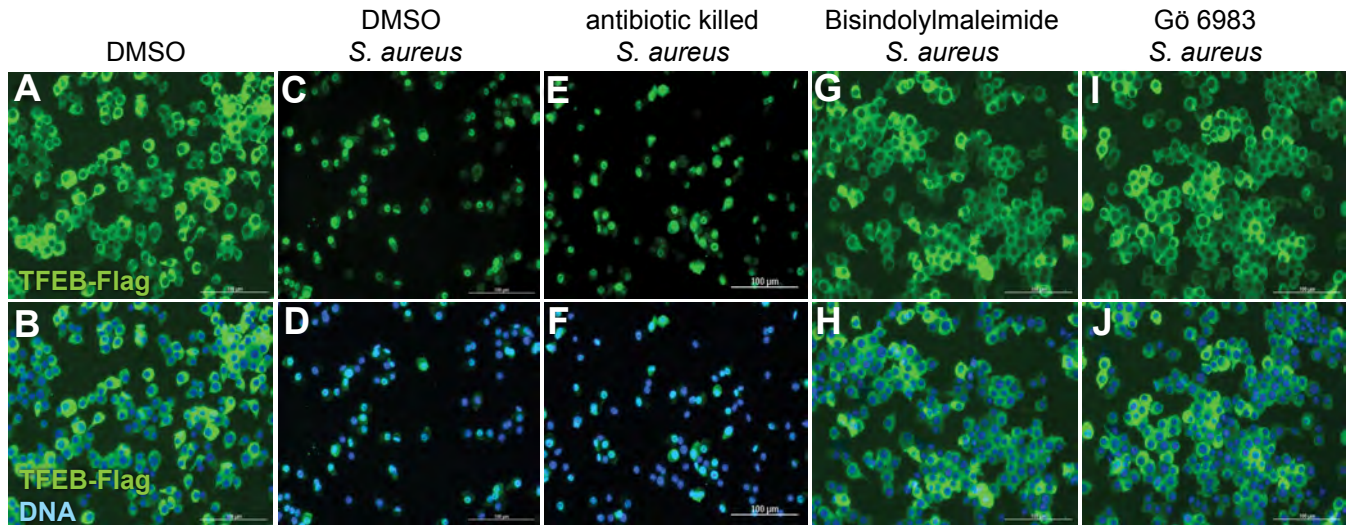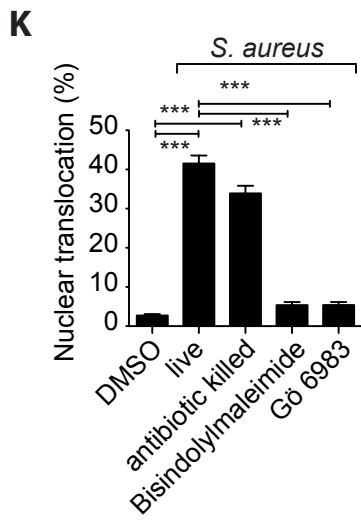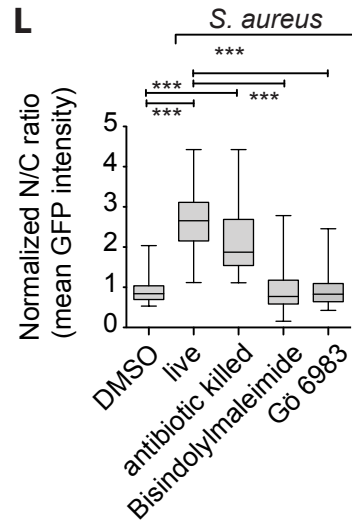

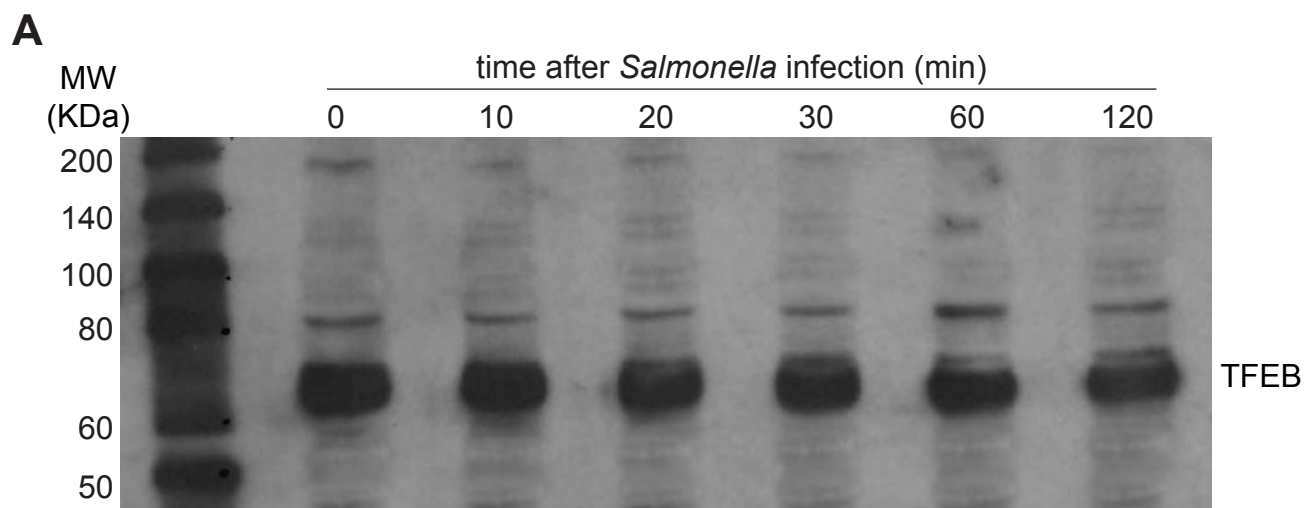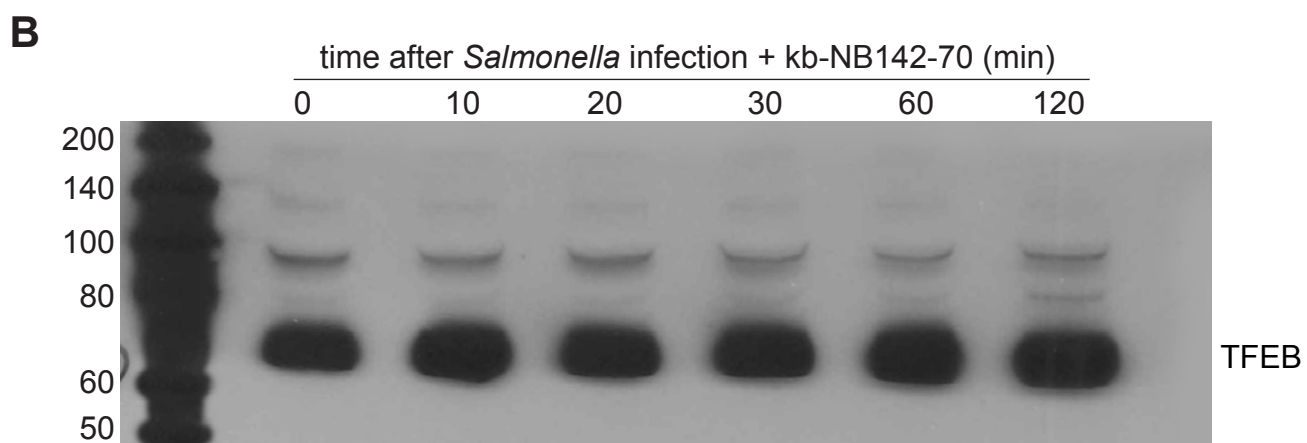



**Figure S1 related to Figure 1. *C. elegans* DKF-1/protein kinase D is necessary and sufficient for the activation of HLH-30.** (A) qRT-PCR of *dkf-1* and *dkf-2* in lysates from animals treated with empty vector control (EV) or *dkf-1* RNAi. Results are normalized to empty vector control animals. Data are mean  $\pm$  SEM (two biological replicates, two technical replicates,  $n \geq 3,000$  per condition) \*  $p \leq 0.05$  (two-sample *t* test). (B) Lifespan of wild type and *hlh-30* mutant animals reared on *E. coli* HT115 carrying *dkf-1* RNAi or empty vector control prior to transfer to *E. coli* OP50. \*\*\*  $p \leq 0.001$  (Log-Rank test). (C) Survival of wild type and *dkf-1(ok2695)* mutant animals infected with *S. aureus*. Shown is a representative experiment of three biological replicates. (D) qRT-PCR of *ilys-2* in wild type or in *pkc-1*, *pkc-2*, *tpa-1*, or *dkf-2* mutants. Results are normalized to wild type animals. Data are mean  $\pm$  SEM (two biological replicates, two technical replicates,  $n \geq 3,000$  per condition). (E) Survival of animals reared on *E. coli* HT115 carrying *plc-1* RNAi or empty vector control (EV) RNAi. \*\*\*  $p \leq 0.001$  (Log-Rank test). (F) Lifespan of animals fed *E. coli* carrying *plc-1* RNAi or empty vector control (EV) RNAi. \*\*\*  $p \leq 0.001$  (Log-Rank test).

**Figure S2 related to Figure 3. PKD1 and PKC $\alpha/\gamma$  are necessary for activation of TFEB by infection.** TFEB-GFP RAW264.7 cells were preincubated with PKC and PKD inhibitors for 1 h previous to infection with *S. enterica* (MOI = 100) for 2 hours. Shown are representative images from one replicate, and quantification of three biological replicates of three technical replicates each. Scale bars = 100  $\mu$ m. (A) DMSO control. (A') detail. (B) *S. enterica* SL1344. (B') detail. (C) 5  $\mu$ M CRT0066101 (PKD inhibitor). (C') detail. (D) 5  $\mu$ M Bisindolylmaleimide IV (pan-PKC inhibitor). (D') detail. (E) 10  $\mu$ M PKC $\epsilon$  Inhibitor Peptide (selectively inhibits PKC $\epsilon$ ). (E') detail. (F) Percentage of cells with nuclear translocation was measured with Gen5 analysis software. (G) GFP intensity in nucleus compared to cytoplasm (N/C ratio) was measured using CellProfiler. Please see *Methods* for more detail. \*\*  $p \leq 0.01$ , \*\*\*  $p \leq 0.001$  (One-way ANOVA followed by Tukey's post-hoc test).

**Figure S3 related to Figure 4. PKC is necessary for TFEB activation after *S. aureus* infection.** TFEB-FLAG RAW264.7 cells were incubated with inhibitor for 1 h prior to infection with *S. aureus* NCTC8325 (MOI = 10) for 2 h, followed by anti-FLAG immunofluorescence and Hoechst DNA staining. Shown are representative

images from one replicate, and quantification of three biological replicates of three technical replicates each. Scale bars = 100  $\mu\text{m}$ . **(A, B)** DMSO control. **(C, D)** *S. aureus*. **(E, F)** *S. aureus* previously killed with 100  $\mu\text{g/ml}$  gentamicin. **(G, H)** 5  $\mu\text{M}$  Bisindolylmaleimide IV (pan-PKC inhibitor). **(I, J)** 5  $\mu\text{M}$  Gö 6983 (pan-PKC inhibitor). **(K)** Percentage of cells with nuclear translocation was measured with Gen5 analysis software. **(L)** GFP intensity in nucleus compared to cytoplasm (N/C ratio) was measured using CellProfiler. Please see *Methods* for more detail. \*\*  $p \leq 0.01$ , \*\*\*  $p \leq 0.001$  (One-way ANOVA followed by Tukey's post-hoc test).

**Figure S4 related to Figure 5A, K. Whole immunoblot pictures with size markers for TFEB antibody.** **(A, B)** RAW264.7 cells were infected with *S. enterica* SL1344 (MOI = 100) for 0 (control), 10, 20, 30, 60, and 120 min, lysed, and subjected to immunoblot analysis. **(A)** TFEB antibody. **(B)** TFEB antibody after SL1344 infection plus 10  $\mu\text{M}$  kb-NB142-70 (specific PKD inhibitor). MW, molecular weight. The TFEB band is indicated on the right.
